# Supplementary material for: Fast and reliable identification of atomically thin layers of TaSe2 crystals
Source: Springer Nature journal article supplement (doi:10.1007/s12274-013-0295-9), 2013-02-02
Supplement: 12274_2013_295_MOESM1_ESM.pdf [file 12274_2013_295_MOESM1_ESM.pdf]

## Electronic Supplementary Material

# Fast and reliable identification of atomically thin layers of TaSe<sub>2</sub> crystals

Andres Castellanos-Gomez<sup>1</sup> (✉), Efrén Navarro-Moratalla<sup>2</sup>, Guillermo Mokry<sup>3</sup>, Jorge Quereda<sup>3</sup>, Elena Pinilla-Cienfuegos<sup>2</sup>, Nicolás Agraït<sup>3,4</sup>, Herre S.J. van der Zant<sup>1</sup>, Eugenio Coronado<sup>2</sup>, Gary A. Steele<sup>1</sup>, and Gabino Rubio-Bollinger<sup>3</sup> (✉)

<sup>1</sup> Kavli Institute of Nanoscience, Delft University of Technology, Lorentzweg 1, 2628 CJ Delft, The Netherlands

<sup>2</sup> Instituto Ciencia Molecular (ICMol), Univ. Valencia, C/Catedrático José Beltrán 2, E-46980, Paterna, Spain

<sup>3</sup> Departamento de Física de la Materia Condensada (C-III). Universidad Autónoma de Madrid, Campus de Cantoblanco, 28049 Madrid, Spain

<sup>4</sup> Instituto Madrileño de Estudios Avanzados en Nanociencia IMDEA-Nanociencia. E-28049 Madrid, Spain

Supporting information to DOI 10.1007/s12274-013-0295-9

### Characterization of atomically thin TaSe<sub>2</sub> crystals

Figures S1 and S2 shows the same information as Fig. 1 in the main text for other two TaSe<sub>2</sub> flakes. Both the optical and atomic force microscopy characterization of the flakes is shown.

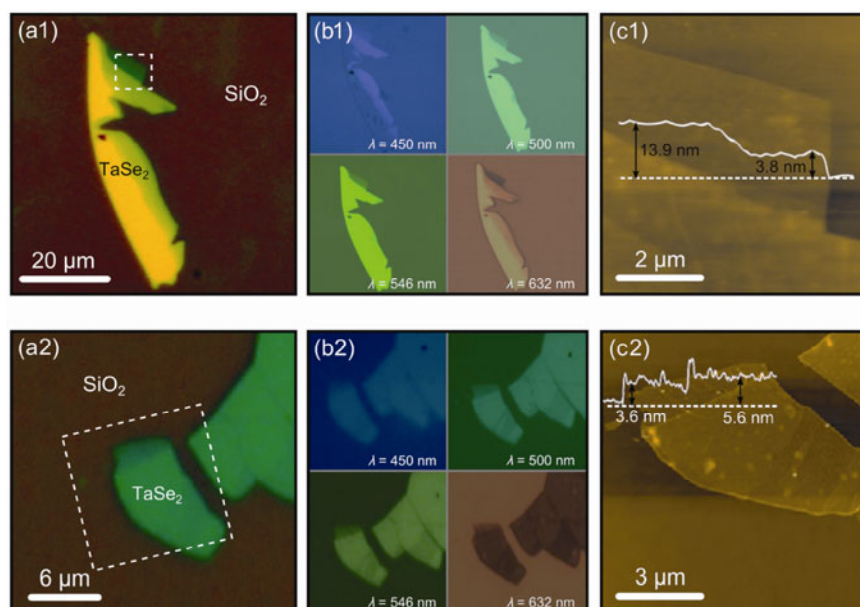

**Figure S1** Optical and atomic force microscopy images of two different TaSe<sub>2</sub> nanosheets: (a) optical micrographs under white illumination of TaSe<sub>2</sub> flakes deposited on a 300 nm SiO<sub>2</sub>/Si substrate; (b) different optical micrographs acquired at 450 nm, 500 nm, 546 nm and 632 nm by using narrow bandwidth filters; (c) AFM topography image of the region marked by a dashed rectangle in (a). A topographic line profile along the horizontal line is inserted to indicate the thickness of the flakes.

Address correspondence to Andres Castellanos-Gomez, a.castellanosgomez@tudelft.nl; Gabino Rubio-Bollinger, gabino.rubio@uam.es

## Refractive index of TaSe<sub>2</sub>

For the calculation of the optical contrast of atomically thin TaSe<sub>2</sub> crystals (see Figs. 2 and 3 of the main manuscript) we employed the complex refractive index reported for bulk 2H-TaSe<sub>2</sub> [S1]. In Ref. [S1], however, the two components of the complex dielectric permittivity are shown. In Fig. S3 we show the complex refractive index calculated from the dielectric permittivity values reported in Ref. [S1].

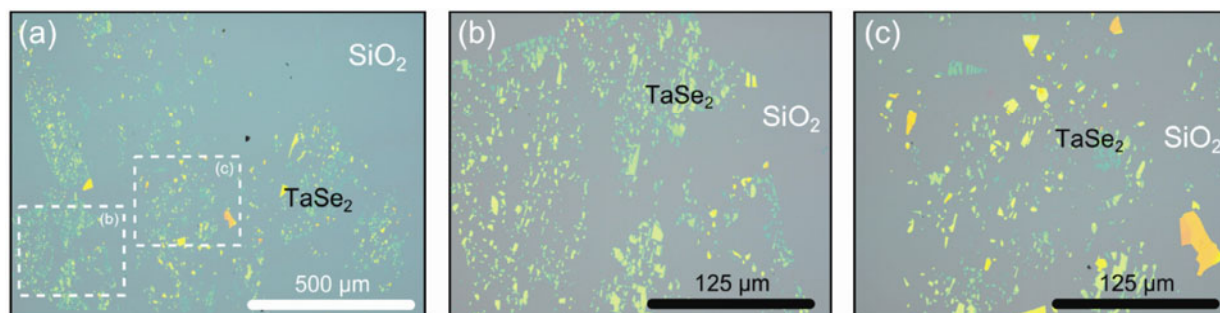

**Figure S2** Low magnification optical images of few-layer TaSe<sub>2</sub> crystals exfoliated onto a 300 nm SiO<sub>2</sub>/Si substrate. Greenish flakes are typically thinner than 10–15 layers. (b) and (c) Close up images of the areas marked by the dashed rectangles in (a).

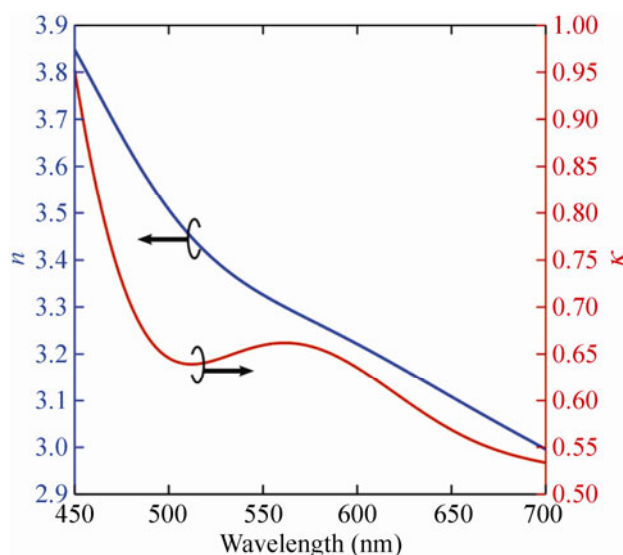

**Figure S3** Complex refractive index (real part  $n$  and absorption  $\kappa$ ) of 2H-TaSe<sub>2</sub> obtained from the dielectric permittivity values reported in Ref. [S1].

## Optimal dielectric thickness to facilitate the optical identification

The optical contrast yielded by a single layer TaSe<sub>2</sub> sheet has been calculated using Eqs. (1) and (2) from the main text and the refractive index reported for bulk 2H-TaSe<sub>2</sub> [S1] (see Fig. S4). We have considered the case of different dielectric layers such as: SiO<sub>2</sub> (a), PMMA (b), Al<sub>2</sub>O<sub>3</sub> (c), HfO<sub>2</sub> (d) and Si<sub>3</sub>N<sub>4</sub> (e). The optimal dielectric thickness to identify ultrathin layers of TaSe<sub>2</sub> has been marked in Fig. S4 with white circles.

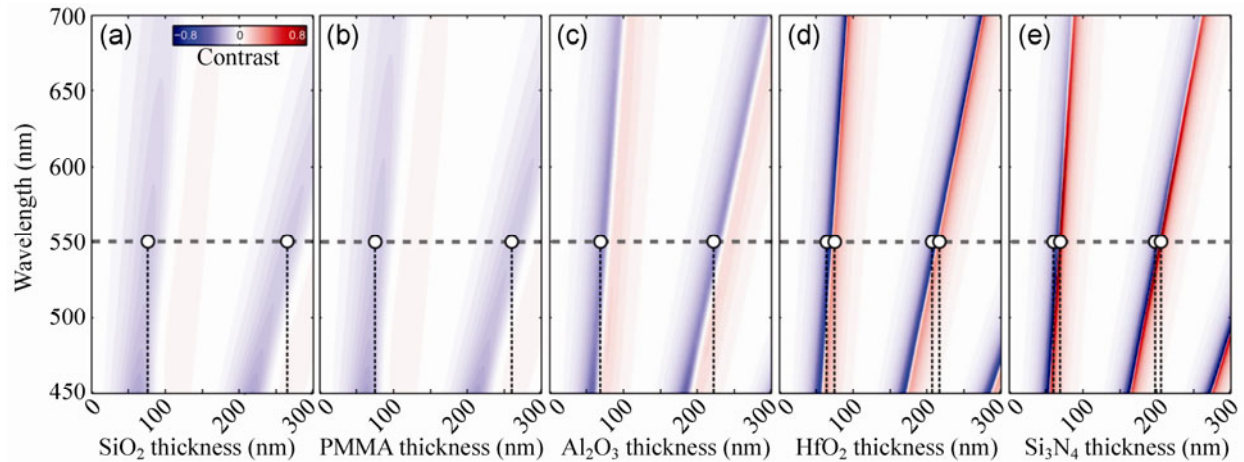

**Figure S4** Optical contrast for a single layer TaSe<sub>2</sub>, 0.64 nm thick, (colormap) as a function of the wavelength and dielectric thickness calculated with Eqs. (1) and (2) and the complex refractive index reported for bulk 2H-TaSe<sub>2</sub> [S1].

For SiO<sub>2</sub>, for instance, the optimal thicknesses to facilitate the optical identification are 80 nm and 265 nm. In Fig. S5 we present the calculated optical contrast as a function of the illumination wavelength and the TaSe<sub>2</sub> thickness for these SiO<sub>2</sub>/Si substrates.

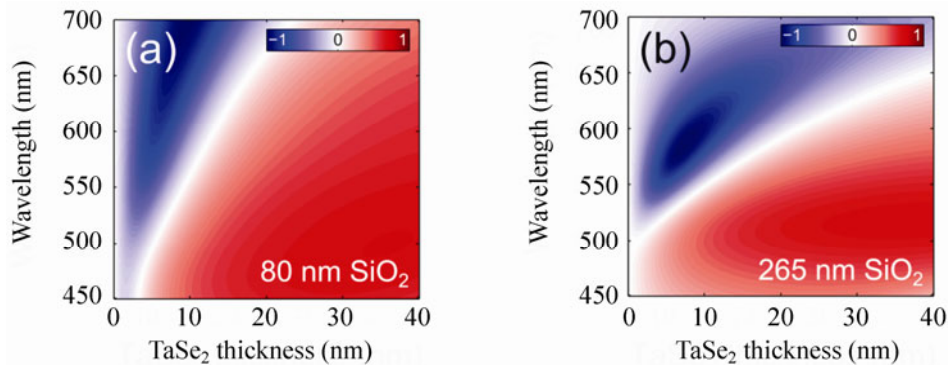

**Figure S5** The calculated optical contrast as a function of the wavelength and the TaSe<sub>2</sub> thicknesses for substrates with (a) 80 nm and (b) 265 nm SiO<sub>2</sub> thickness (which are optimal to identify ultrathin TaSe<sub>2</sub> on SiO<sub>2</sub>/Si wafers).

### Characterization of the laser-induced defects

As pointed out in Fig. 5 of the main text, prolonged or high intensity Raman spectroscopy measurements on TaSe<sub>2</sub> flakes causes laser-induced defects. These defects can be easily identified because they drastically change the optical contrast of the TaSe<sub>2</sub> flakes. Figure S6(a) shows an optical image of TaSe<sub>2</sub> several flakes. The central flake has been subjected to a prolonged Raman spectroscopy image which damaged the flake as can be seen from the change in contrast inside the black frame in Fig. S6(a). Figure S6(b) shows the AFM topography of the damaged region.

As seen in Fig. S6, although the optical contrast drastically changed, the thickness of the flake was scarcely affected. This indicates that the laser-induced damage of the flake alters its optical contrast. This is in agreement with the occurrence of laser-induced oxidation, as tantalum oxide is expected to have a lower optical absorption coefficient than TaSe<sub>2</sub>, thus explaining the reduced optical contrast. Therefore, optical contrast can be used to determine whether a Raman spectroscopy measurement has damaged the sample or not.

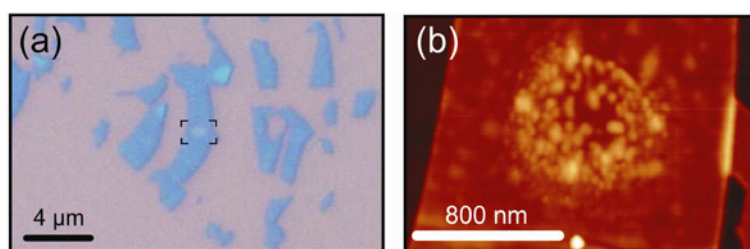

**Figure S6** (a) Optical image of TaSe<sub>2</sub> after an intrusive Raman spectroscopy measurement. The laser-induced defects are clearly visible as a drastic change in optical contrast (see the region within the black frame). (b) AFM topography image of the region within the black frame in (a) showing that the region was modified during the Raman spectroscopy measurements.

Figure S7 shows another example where a high power laser was scanned over part of the surface of a TaSe<sub>2</sub> flake to intentionally damage it. The optical images before (a) and after (b) clearly show that one can identify the laser-modified part just by the difference in optical contrast. The AFM topography in Fig. S7(c) shows a slight decrease of the thickness of the region modified with the laser. Note that this small reduction in the thickness is not sufficient to explain the drastic reduction of the optical contrast in the scanned area.

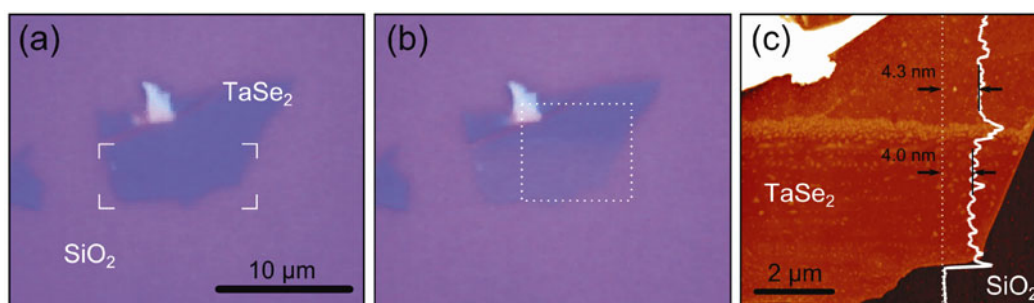

**Figure S7** Optical images of TaSe<sub>2</sub> (a) before and (b) after scanning with a high-power laser (10 mW, 500 nm spot size, scanning steps of 500 nm with a waiting time of 0.1 s between steps). The laser scanning was carried out in the region denoted by the white frame in (a). (c) The AFM topography of the region marked by the dotted square in (b). A topographic line profile has been included in (c).

In order to obtain more information about the nature of the laser-induced damage on the TaSe<sub>2</sub> flakes we carried out Raman spectroscopy measurements on a TaSe<sub>2</sub> flake while increasing the laser power (Fig. S8). The flake was deposited onto a gold electrode to avoid the strong signal from the silicon underneath (with intense peaks around 950 cm<sup>-1</sup>, 520 cm<sup>-1</sup> and 300 cm<sup>-1</sup>), which hampers the identification of some of the laser-induced features in the Raman spectra. For a low power laser, the Raman spectra show the  $E_{2g}^1$  and  $A_{1g}$  peaks (see Fig. 4 of the main text) and a background signal. With increasing power, however, a feature around 255 cm<sup>-1</sup> starts to develop (as seen in Fig. 5 of the main text) and becomes more and more pronounced as the exposure to the laser increases. This Raman peak matches the energy of the most intense Raman peak for crystalline Ta<sub>2</sub>O<sub>5</sub> in that part of the spectrum [S2]. Furthermore, together with the appearance of the peak at 255 cm<sup>-1</sup>, two broad peaks around 1,350 cm<sup>-1</sup> and 1,550 cm<sup>-1</sup> develop. These peaks correspond to a photoluminescence emission around 550 nm to 560 nm. Note that photoluminescence emission of similar characteristics has been observed for Ta<sub>2</sub>O<sub>5</sub> of different forms (nanorods, nanoblocks, etc.) [S3, S4].

In summary, the observed change in the optical contrast, the presence of a Raman peak at 255 cm<sup>-1</sup> and the photoluminescence emission around 550–560 nm suggest that the laser-induced defects are probably due to the oxidation of tantalum to give Ta<sub>2</sub>O<sub>5</sub>. Nevertheless, more work would be necessary to study this oxidation process in more detail, which is out of the scope of the current work.

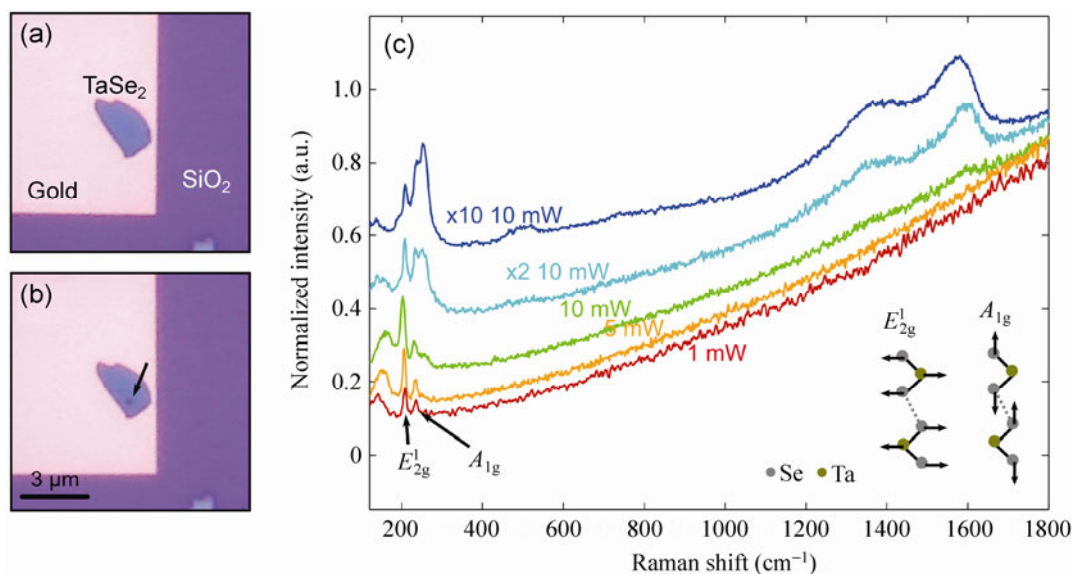

**Figure S8** Optical images of TaSe<sub>2</sub> deposited on a gold electrode (a) before and (b) after performing several Raman spectroscopy measurements with different laser power. (c) Raman spectra measured on the TaSe<sub>2</sub> with 1 mW (1 s accumulation), 5 mW (1 s accumulation), 10 mW (1 s accumulation), 10 mW (2 s accumulation) and 10 mW (10 s accumulation) laser power.

## References

- [S1] Beal, A. R.; Hughes, H. P.; Liang, W. Y. The reflectivity spectra of some group *VA* transition metal dichalcogenides. *J. Phys. C: Solid State Phys.* **1975**, *8*, 4236.
- [S2] Dobal, P. S.; Katiyar, R. S.; Jiang, Y.; Guo, R.; Bhalla, A. S. Raman scattering study of a phase transition in tantalum pentoxide. *J. Raman Spectrosc.* **2000**, *31*, 1061–1065.
- [S3] Devan, R. S.; Lin, C. L.; Gao, S. Y.; Cheng, C. L.; Liou, Y.; Ma, Y. R. Enhancement of green-light photoluminescence of Ta<sub>2</sub>O<sub>5</sub> nanoblock stacks. *Phys. Chem. Chem. Phys.* **2011**, *13*, 13441–13446.
- [S4] Devan, R. S.; Ho, W. D.; Chen, C. H.; Shiu, H. W.; Ho, C. H.; Cheng, C. L.; Wu, S. Y.; Liou, Y.; Ma, Y. R. High room-temperature photoluminescence of one-dimensional Ta<sub>2</sub>O<sub>5</sub> nanorod arrays. *Nanotechnology* **2009**, *20*, 445708.
